# Supplementary material
Source: publisher figshare collection journal article supplement (https://acs.figshare.com/ndownloader/files/14414660)
Supplement: Supplementary file 1 [file 14414660]

## Sheet: Sheet1
Table S1: Concentrations of UPS2 proteins. Proteins were spiked into mouse cerebellum background (peptide concentration 1µg/µl ).
			UPS2 concentration in mouse cerebellum background					Amount on column for DIA runs (2µl injection volume)
UPS2 Protein	Tier	Unit	S1	S2	S3	S4	S5	Unit	S1	S2	S3	S4	S5
P00915	6	fmol/ul	5	5.5	7.2	13.6	50.3	fmol	10	11	14.4	27.2	100.6
P00918	6	fmol/ul	5	5.5	7.2	13.6	50.3	fmol	10	11	14.4	27.2	100.6
P01031	6	fmol/ul	5	5.5	7.2	13.6	50.3	fmol	10	11	14.4	27.2	100.6
P69905	6	fmol/ul	5	5.5	7.2	13.6	50.3	fmol	10	11	14.4	27.2	100.6
P68871	6	fmol/ul	5	5.5	7.2	13.6	50.3	fmol	10	11	14.4	27.2	100.6
P41159	6	fmol/ul	5	5.5	7.2	13.6	50.3	fmol	10	11	14.4	27.2	100.6
P02768	6	fmol/ul	5	5.5	7.2	13.6	50.3	fmol	10	11	14.4	27.2	100.6
P62988	6	fmol/ul	5	5.5	7.2	13.6	50.3	fmol	10	11	14.4	27.2	100.6
P04040	5	fmol/ul	0.5	0.55	0.72	1.36	5.03	fmol	1	1.1	1.44	2.72	10.06
P00167	5	fmol/ul	0.5	0.55	0.72	1.36	5.03	fmol	1	1.1	1.44	2.72	10.06
P01133	5	fmol/ul	0.5	0.55	0.72	1.36	5.03	fmol	1	1.1	1.44	2.72	10.06
P02144	5	fmol/ul	0.5	0.55	0.72	1.36	5.03	fmol	1	1.1	1.44	2.72	10.06
P15559	5	fmol/ul	0.5	0.55	0.72	1.36	5.03	fmol	1	1.1	1.44	2.72	10.06
P62937	5	fmol/ul	0.5	0.55	0.72	1.36	5.03	fmol	1	1.1	1.44	2.72	10.06
Q06830	5	fmol/ul	0.5	0.55	0.72	1.36	5.03	fmol	1	1.1	1.44	2.72	10.06
P63165	5	fmol/ul	0.5	0.55	0.72	1.36	5.03	fmol	1	1.1	1.44	2.72	10.06
P00709	4	amol/ul	50	55	72	136	503	amol	100	110	144	272	1006
P06732	4	amol/ul	50	55	72	136	503	amol	100	110	144	272	1006
P12081	4	amol/ul	50	55	72	136	503	amol	100	110	144	272	1006
P61626	4	amol/ul	50	55	72	136	503	amol	100	110	144	272	1006
Q15843	4	amol/ul	50	55	72	136	503	amol	100	110	144	272	1006
P02753	4	amol/ul	50	55	72	136	503	amol	100	110	144	272	1006
P16083	4	amol/ul	50	55	72	136	503	amol	100	110	144	272	1006
P63279	4	amol/ul	50	55	72	136	503	amol	100	110	144	272	1006
P01008	3	amol/ul	5	5.5	7.2	13.6	50.3	amol	10	11	14.4	27.2	100.6
P61769	3	amol/ul	5	5.5	7.2	13.6	50.3	amol	10	11	14.4	27.2	100.6
P55957	3	amol/ul	5	5.5	7.2	13.6	50.3	amol	10	11	14.4	27.2	100.6
O76070	3	amol/ul	5	5.5	7.2	13.6	50.3	amol	10	11	14.4	27.2	100.6
P08263	3	amol/ul	5	5.5	7.2	13.6	50.3	amol	10	11	14.4	27.2	100.6
P01344	3	amol/ul	5	5.5	7.2	13.6	50.3	amol	10	11	14.4	27.2	100.6
P01127	3	amol/ul	5	5.5	7.2	13.6	50.3	amol	10	11	14.4	27.2	100.6
P10599	3	amol/ul	5	5.5	7.2	13.6	50.3	amol	10	11	14.4	27.2	100.6
P99999	2	amol/ul	0.5	0.55	0.72	1.36	5.03	amol	1	1.1	1.44	2.72	10.06
P06396	2	amol/ul	0.5	0.55	0.72	1.36	5.03	amol	1	1.1	1.44	2.72	10.06
P09211	2	amol/ul	0.5	0.55	0.72	1.36	5.03	amol	1	1.1	1.44	2.72	10.06
P01112	2	amol/ul	0.5	0.55	0.72	1.36	5.03	amol	1	1.1	1.44	2.72	10.06
P01579	2	amol/ul	0.5	0.55	0.72	1.36	5.03	amol	1	1.1	1.44	2.72	10.06
P02787	2	amol/ul	0.5	0.55	0.72	1.36	5.03	amol	1	1.1	1.44	2.72	10.06
O00762	2	amol/ul	0.5	0.55	0.72	1.36	5.03	amol	1	1.1	1.44	2.72	10.06
P51965	2	amol/ul	0.5	0.55	0.72	1.36	5.03	amol	1	1.1	1.44	2.72	10.06
P08758	1	amol/ul	0.05	0.055	0.072	0.136	0.503	amol	0.1	0.11	0.144	0.272	1.006
P02741	1	amol/ul	0.05	0.055	0.072	0.136	0.503	amol	0.1	0.11	0.144	0.272	1.006
P05413	1	amol/ul	0.05	0.055	0.072	0.136	0.503	amol	0.1	0.11	0.144	0.272	1.006
P10145	1	amol/ul	0.05	0.055	0.072	0.136	0.503	amol	0.1	0.11	0.144	0.272	1.006
P02788	1	amol/ul	0.05	0.055	0.072	0.136	0.503	amol	0.1	0.11	0.144	0.272	1.006
P10636-8	1	amol/ul	0.05	0.055	0.072	0.136	0.503	amol	0.1	0.11	0.144	0.272	1.006
P00441	1	amol/ul	0.05	0.055	0.072	0.136	0.503	amol	0.1	0.11	0.144	0.272	1.006
P01375	1	amol/ul	0.05	0.055	0.072	0.136	0.503	amol	0.1	0.11	0.144	0.272	1.006
